# Supplementary material for: Virseqimprover: an integrated pipeline for viral contig error correction, extension, and annotation
Source: PeerJ journal article supplement (doi:10.7717/peerj.18515), 2025-01-10

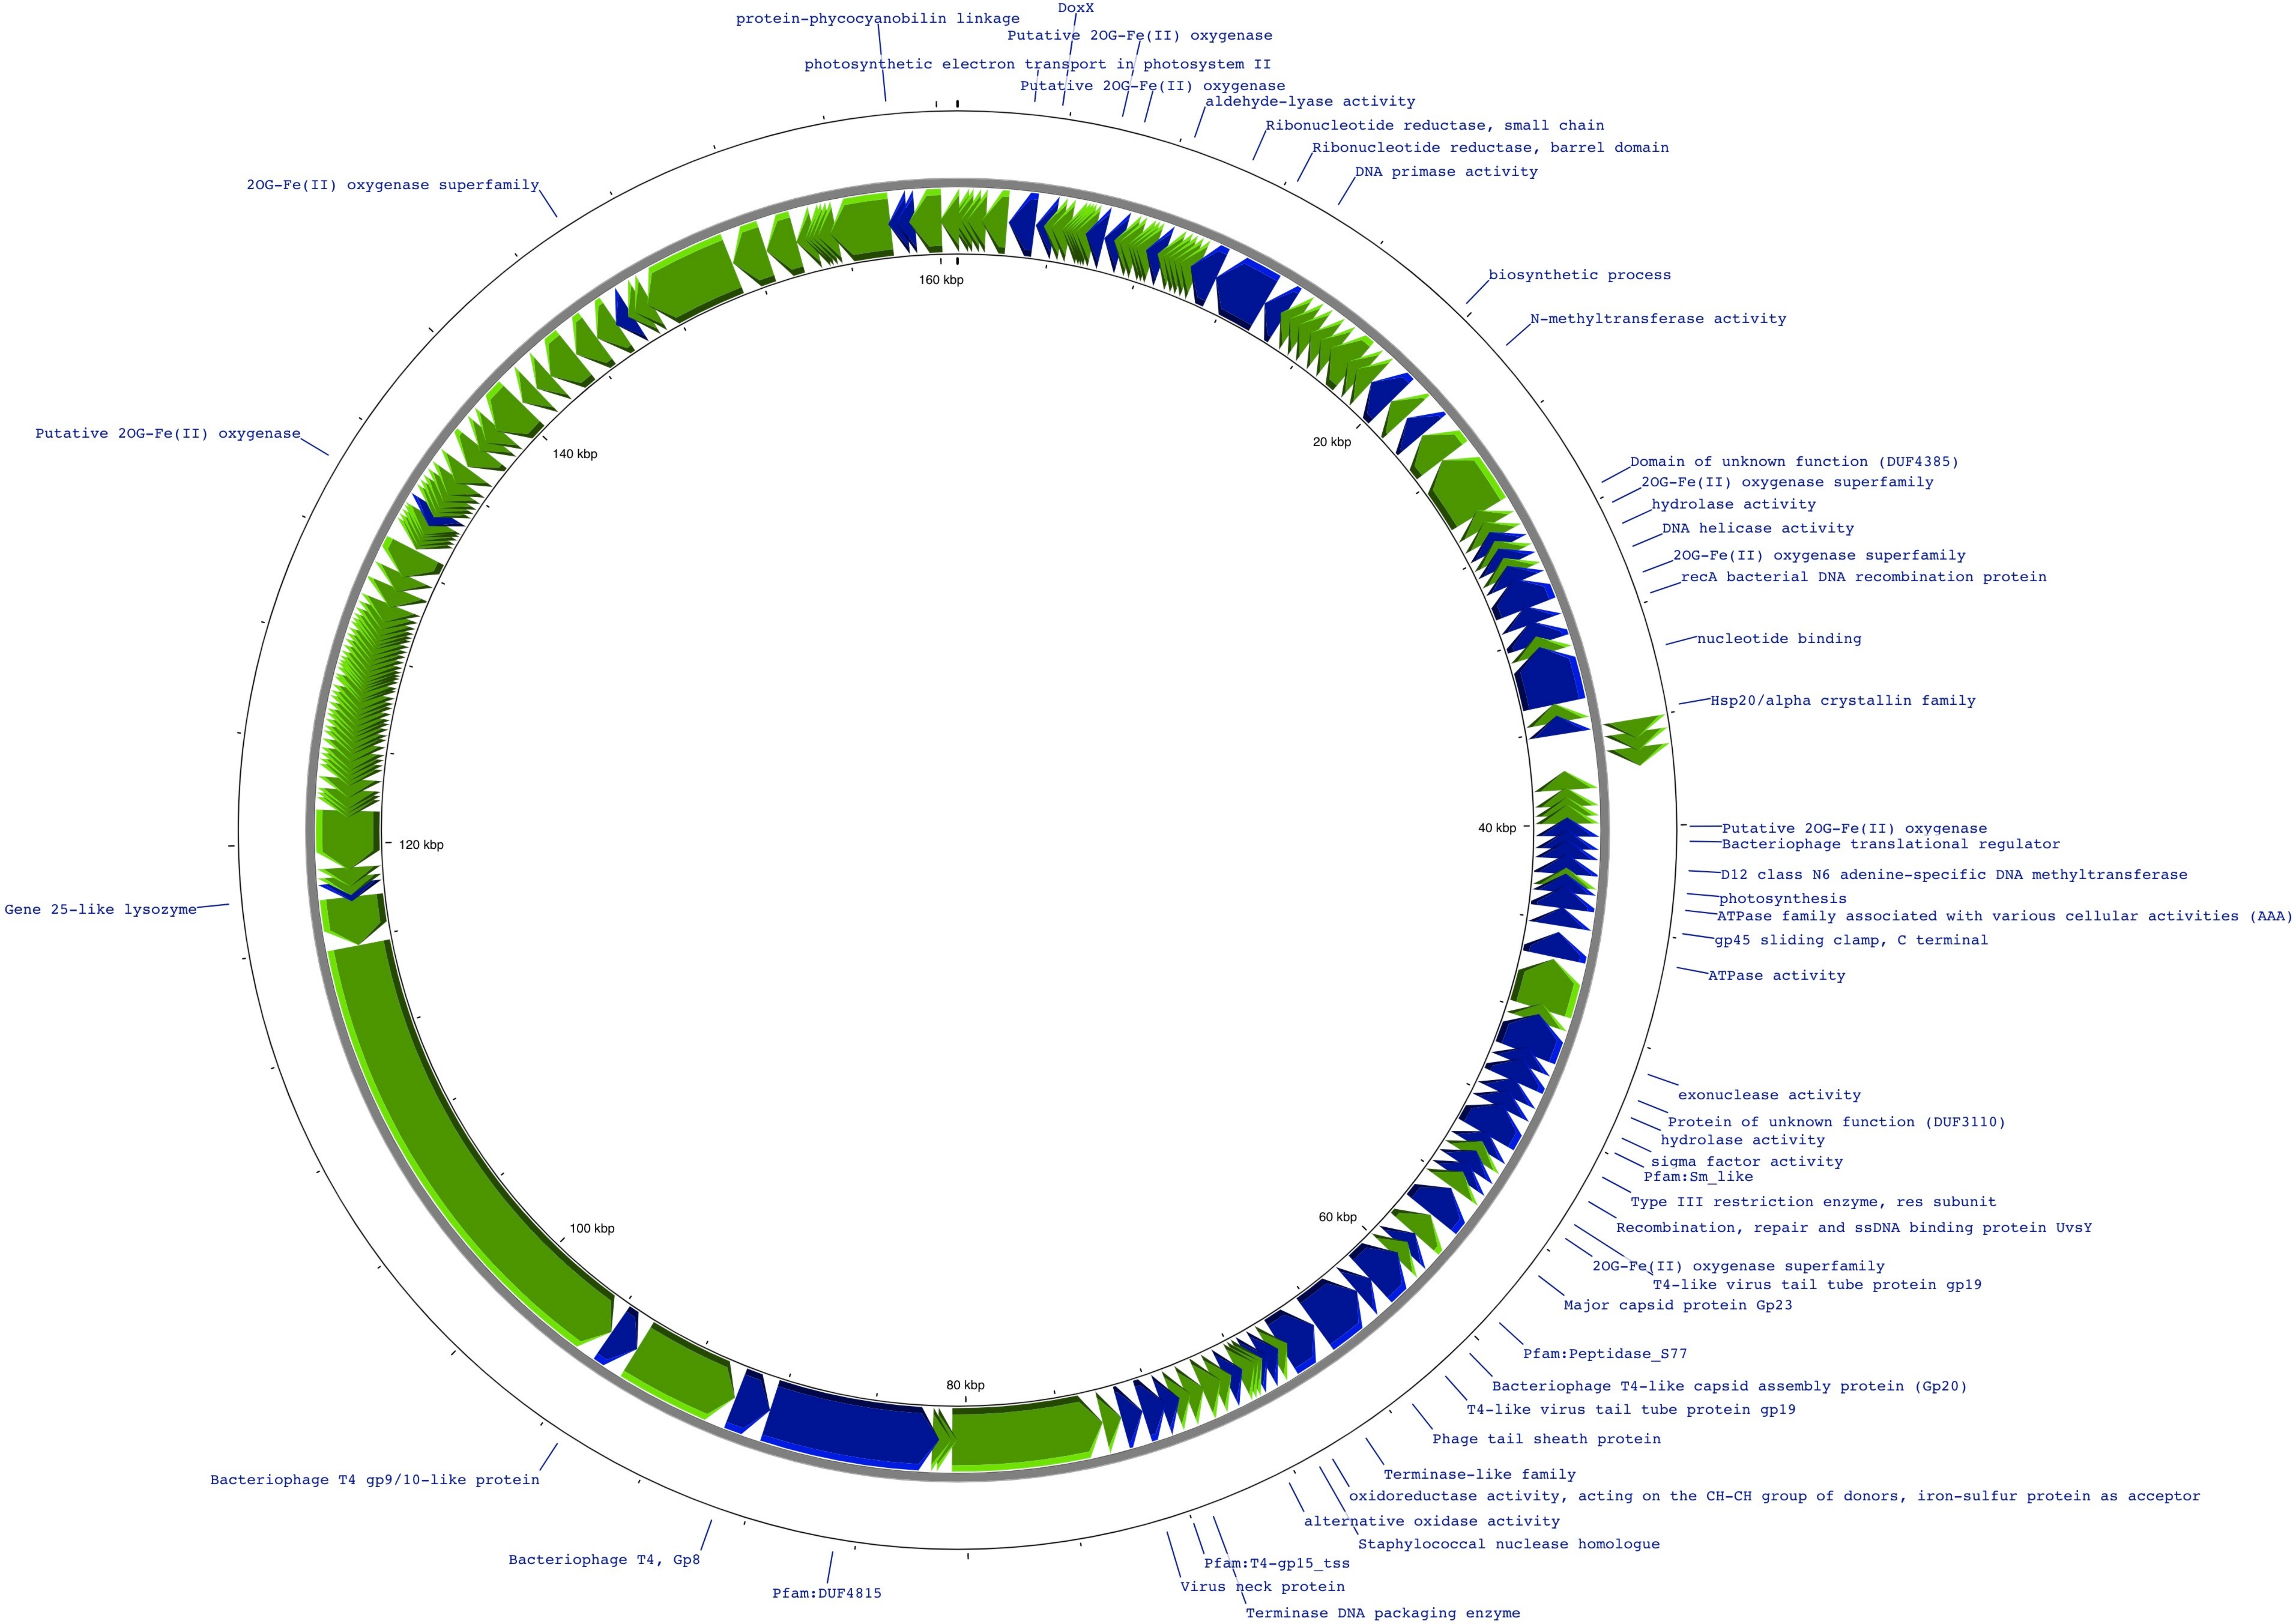

Supplement: Supplimentary_figure_1.pdf [file Supplimentary_figure_1.pdf]
